# Supplementary material
Source: Springer Nature journal article supplement (https://www.springermedizin.de/resource/supplementary/13098_2013_410_MOESM1_ESM.pdf/9671034)

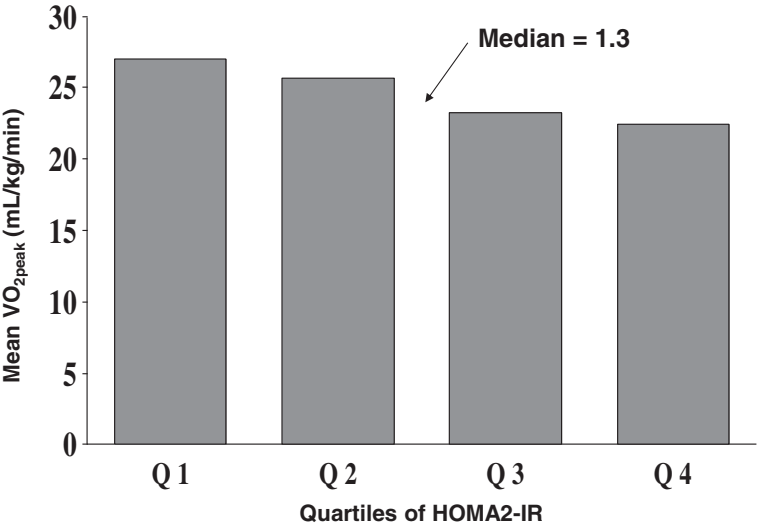

Supplement: MOESM1 [file 9671034]
